# Supplementary material for: Modulation of μ‐opioid receptor activation by acidic pH is dependent on ligand structure and an ionizable amino acid residue
Source: PubMed Central journal article supplement (PMC6932940; doi:10.1111/bph.14810), 2019-12-05
Supplement: BPH-176-4510-s001.pdf [file BPH-176-4510-s001.pdf]

**Supporting Information to manuscript “Modulation of mu-opioid receptor activation by acidic pH is dependent on ligand structure and an ionizable amino acid residue”**

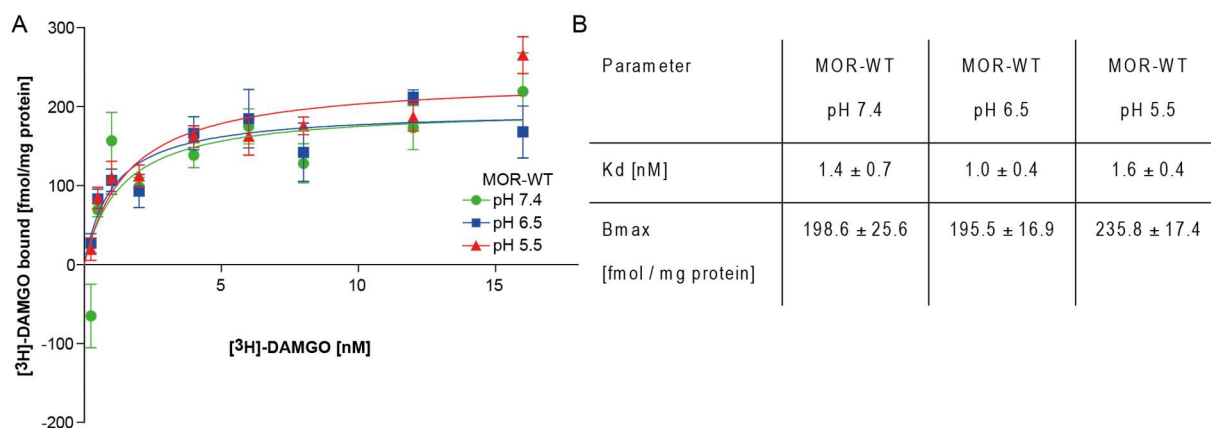

**Supporting Figure S1. [<sup>3</sup>H]-DAMGO binding after pre-incubation at low pH**

[<sup>3</sup>H]-DAMGO saturation binding to membrane fractions of HEK MOR-WT at pH 7.4, following pre-incubation for 20 min at different pH values. Data represent means ± SEM of fmol of bound [<sup>3</sup>H]-DAMGO per mg of total protein with nonlinear fit. **(B)** Parameters derived from curve fits in A. K<sub>d</sub> and B<sub>max</sub> were each compared by One-way ANOVA, no significant differences were found, *n* = 6 per experiment.

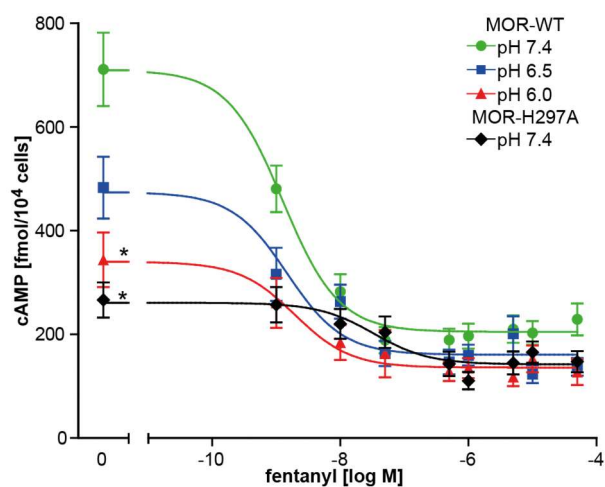

**Supporting Figure S2. Fentanyl effects on cAMP content in HEK MOR-WT and MOR-H297<sup>6.52</sup>A.**

Fentanyl-induced cAMP reduction in HEK MOR-WT and HEK MOR-H297<sup>6.52</sup>A. Data are expressed as cAMP per 10<sup>4</sup> cells and represent mean ± SEM with nonlinear fit. Baselines in absence of fentanyl were analyzed by One-way ANOVA with Dunnett's Multiple Comparison Test (control group = MOR-WT pH 7.4), \*  $P < 0.05$ , n= 6 per curve.

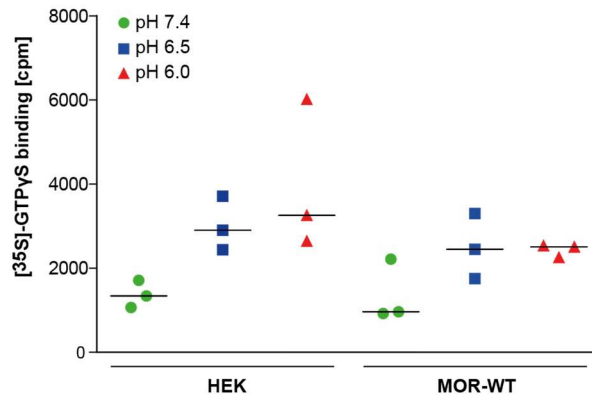

**Supporting Figure S3. Basal [<sup>35</sup>S]-GTPγS binding at physiological and low pH**

Basal [<sup>35</sup>S]-GTPγS binding at pH 7.4, 6.5 and 6.0 in membrane fractions of HEK WT and HEK MOR-WT in absence of opioid ligands. Data represent specific [<sup>35</sup>S]-GTPγS bound in cpm by experiment (dots) with mean (lines), *n* = 3 per condition.

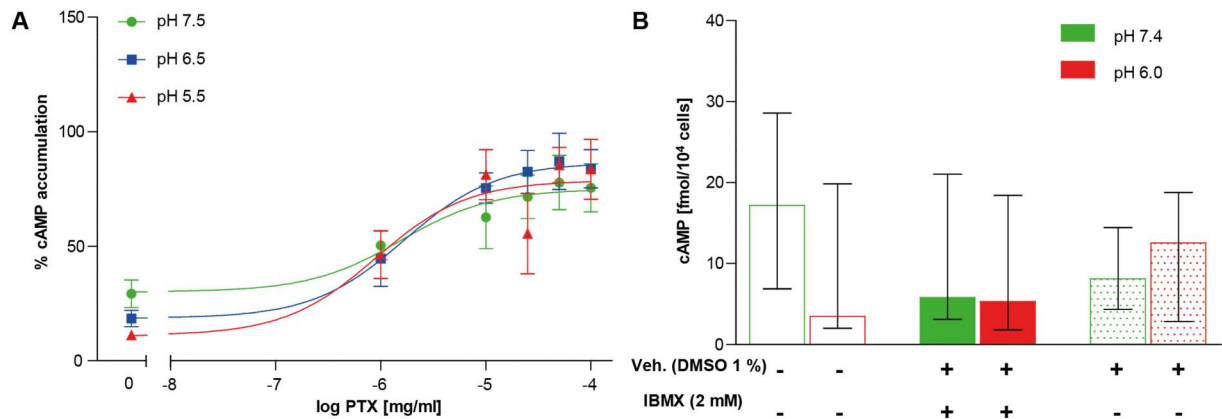

**Supporting Figure S4. Effects of pertussis toxin on cAMP accumulation and basal cAMP concentrations in intact HEK MOR-WT cells at different pH values**

(A) Reversal of fentanyl-induced cAMP reduction by PTX in HEK MOR-WT cells. Data are normalized to cAMP levels in absence of fentanyl and PTX at the respective pH and represent mean  $\pm$  SEM with nonlinear fit. Comparison of fits with extra sum of squares F test (Top, logEC<sub>50</sub>), ns, one curve for all datasets, n = 5 per curve. (B) cAMP accumulation in HEK MOR-WT at extracellular pH 7.4 or 6.0, in absence or presence of dimethyl sulfoxide (DMSO) and/or 3-isobutyl-1-methylxanthine (IBMX). Data represent median with interquartile range of cAMP in fmol/ 10<sup>4</sup> cells, Friedman test, ns, n = 6 per condition.
